# Supplementary material for: Tripartite antigen-agnostic combination immunotherapy cures established poorly immunogenic tumors
Source: HighWire-hosted journal article supplement (doi:10.1136/jitc-2022-004781), 2022-10-01
Supplement: jitc-2022-004781supp005_data_supplement.pdf [file jitc-2022-004781supp005_data_supplement.pdf]

| M1 signature | M2 signature |
|--------------|--------------|
| Sec23b       | Hibch        |
| Usp25        | Ctnnbip1     |
| Plekhf1      | Ormdl1       |
| Eif4e3       | Hmgcl1       |
| Rnf11        | Stub1        |
| Cln5         | Tinf2        |
| Gspt1        | Lnx2         |
| Ddx27        | Cbx5         |
| Braf         | Mdh2         |
| Cxcl16       | Xrcc6        |
| Aff1         | Nfs1         |
|              | Selplg       |
|              | Cdc23        |
|              | Aco2         |
|              | Mrps35       |
|              | Sumf1        |
|              | Polr3k       |
|              | Phb2         |
|              | Commd6       |
|              | Fahd1        |
|              | Aak1         |
